# Supplementary material for: Effect of substituents on the electron transport properties of bay substituted perylene diimide derivatives
Source: Royal Society of Chemistry journal article supplement (doi:10.1039/b901847f), 2009-01-01

**Supporting information for**

**Effect of substituents on the electron transport properties of bay substituted perylene diimide derivatives**

**Sivamurugan Vajiravelu,<sup>a</sup> Lygaitis Ramunas,<sup>b</sup> Gražulevičius Juozas Vidas,<sup>b</sup> Gaidelis Valentas,<sup>c</sup> Jankauskas Vygintas<sup>c</sup> and Suresh Valiyaveetil<sup>\*a</sup>**

<sup>a</sup>*Department of Chemistry, National University of Singapore, 3 Science Drive 3, Singapore 117 543*

<sup>b</sup>*Department Organic Technology, Kaunas University of Technology, Radvilenu pl. 19, LT-50254, Kaunas, Lithuania*

<sup>c</sup>*Department of Solid State Electronics, Vilnius University, Sauletekio al. 9, LT-10222, Vilnius, Lithuania*

**Figure 1S** –  $^1\text{H}$  NMR of 1,7-dibromo perylene

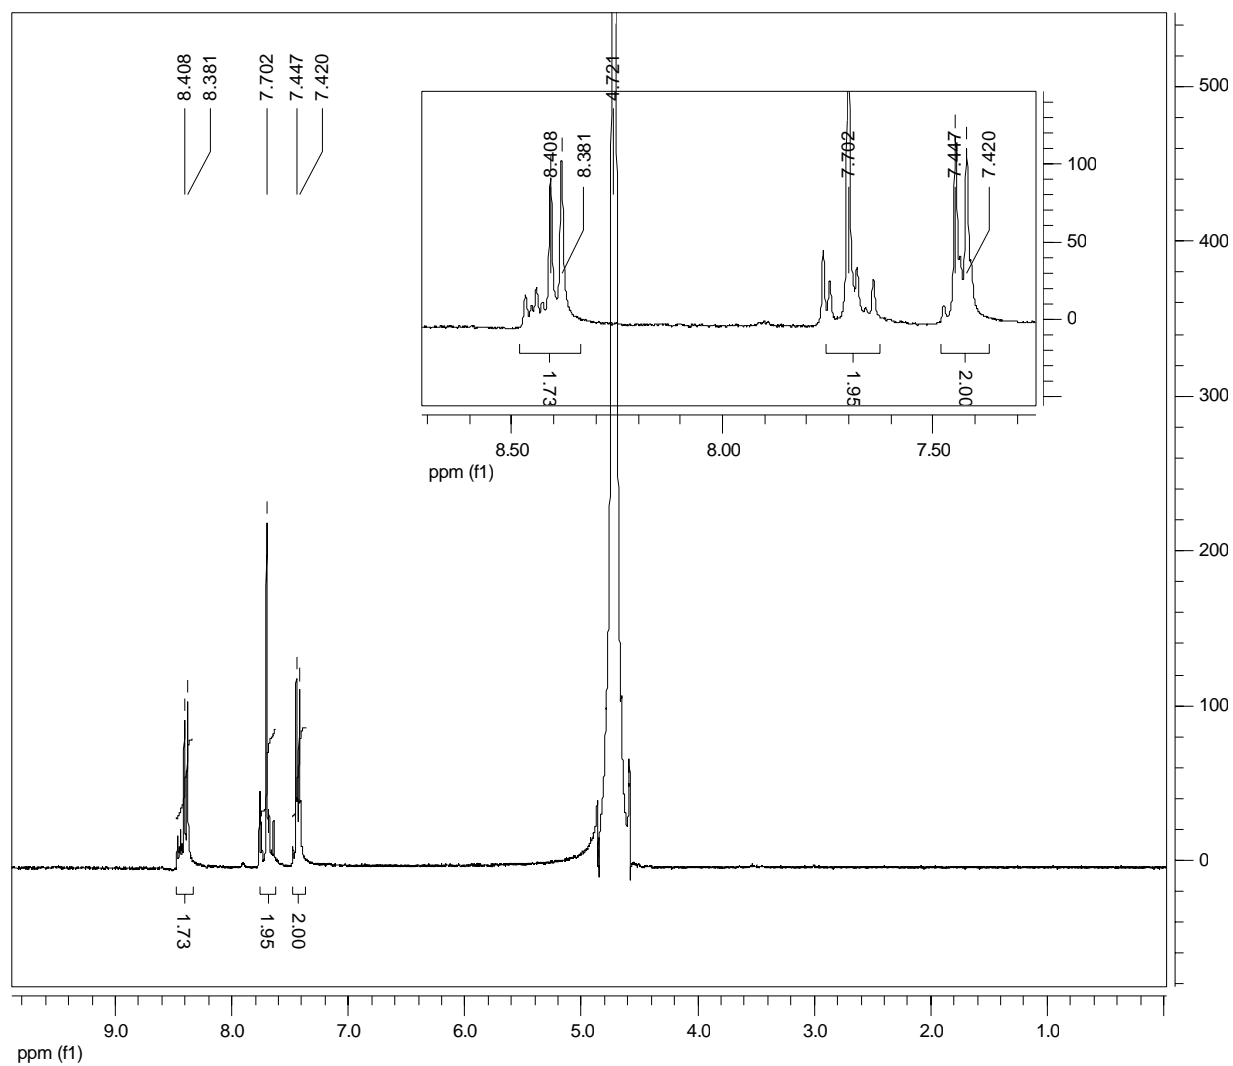

siva239

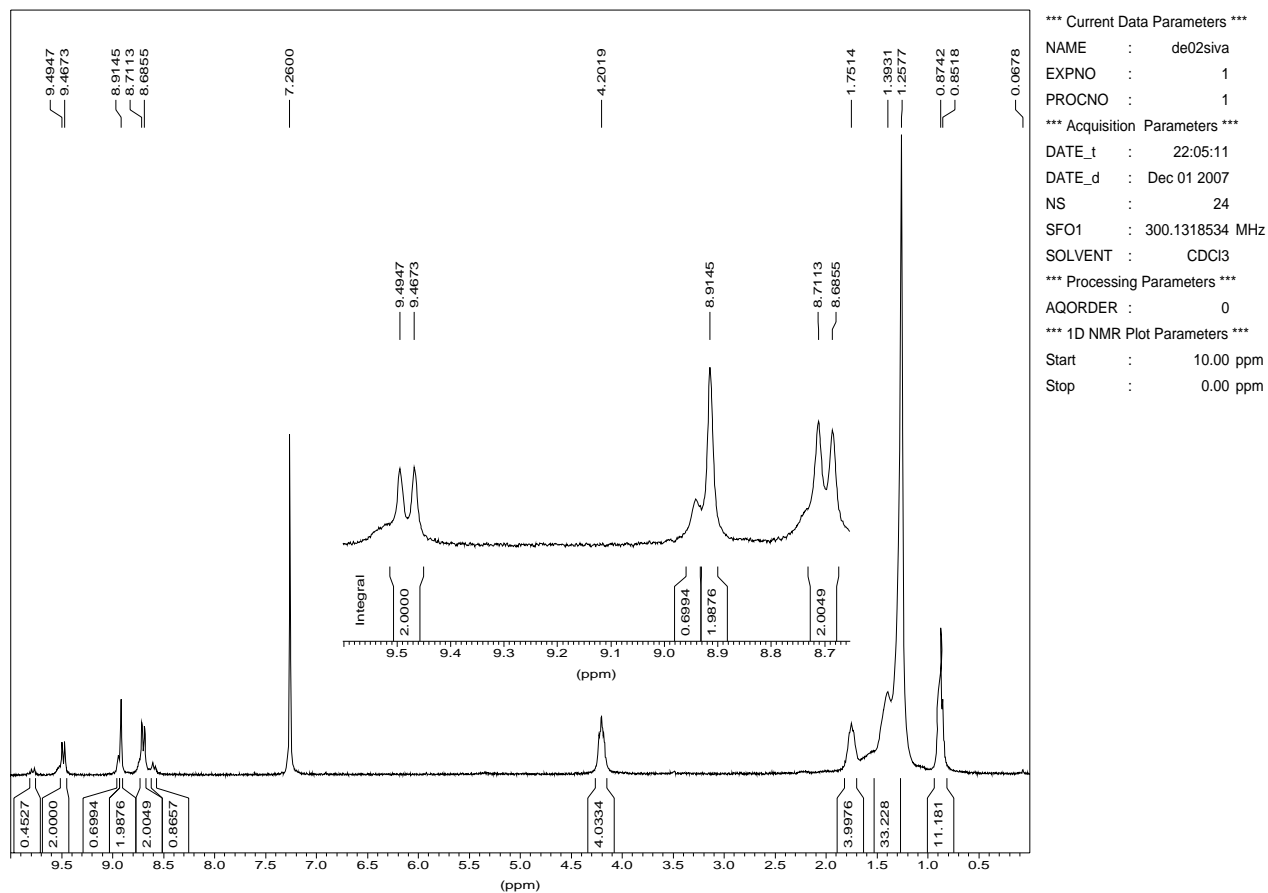

**Figure 2S** –  $^1\text{H}$  NMR spectrum of 1,7-dibromo-N,N'-dodecyl perylene bisimide (PDI)

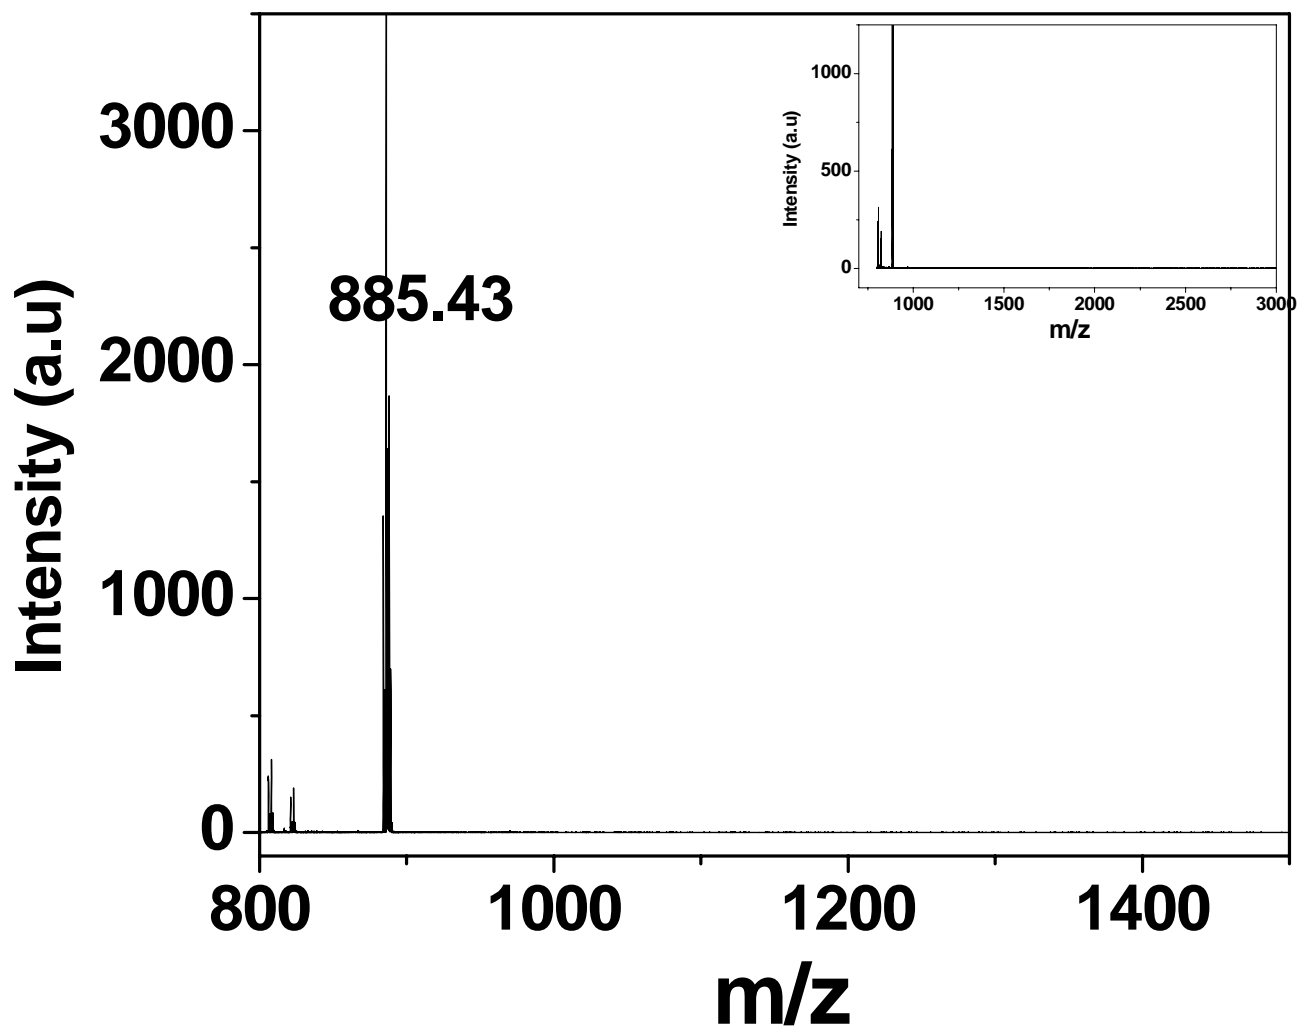

Figure 3S – MALDI-TOF spectrum of 1,7-dibromo-N,N'-dodecyl perylene bisimide (PDI)

Figure 4S.  $^1\text{H}$  and  $^{13}\text{C}$  NMR of PDI1

siva232

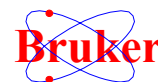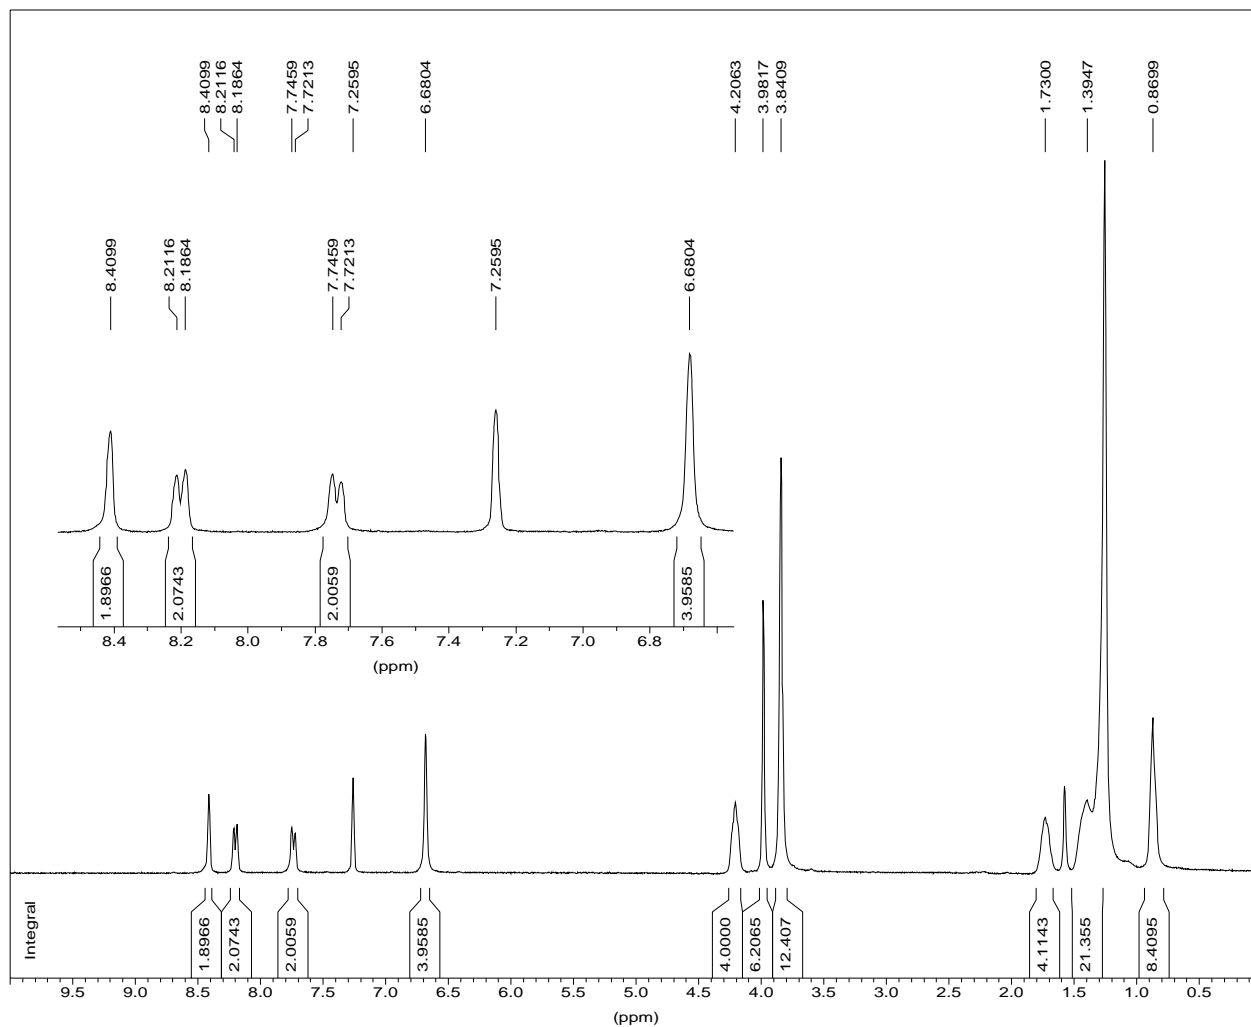

\*\*\* Current Data Parameters \*\*\*  
NAME : nv20siva  
EXPNO : 1  
PROCNO : 1  
\*\*\* Acquisition Parameters \*\*\*  
DATE\_t : 05:11:34  
DATE\_d : Nov 20 2007  
DS : 0  
NS : 24  
O1 : 1853.43 Hz  
O2 : 1853.43 Hz  
O3 : 1853.43 Hz  
SFO1 : 300.1318534 MHz  
SFO2 : 300.1318534 MHz  
SFO3 : 300.1318534 MHz  
SOLVENT : CDCl3  
\*\*\* Processing Parameters \*\*\*  
AZFW : 0.100 ppm  
\*\*\* 1D NMR Plot Parameters \*\*\*  
SR : 12.05 Hz

Supplementary Material (ESI) for *Journal of Materials Chemistry*  
This journal is © the Royal Society of Chemistry 2009

$^{13}\text{C}$  of PDI1

siva232

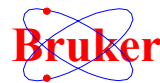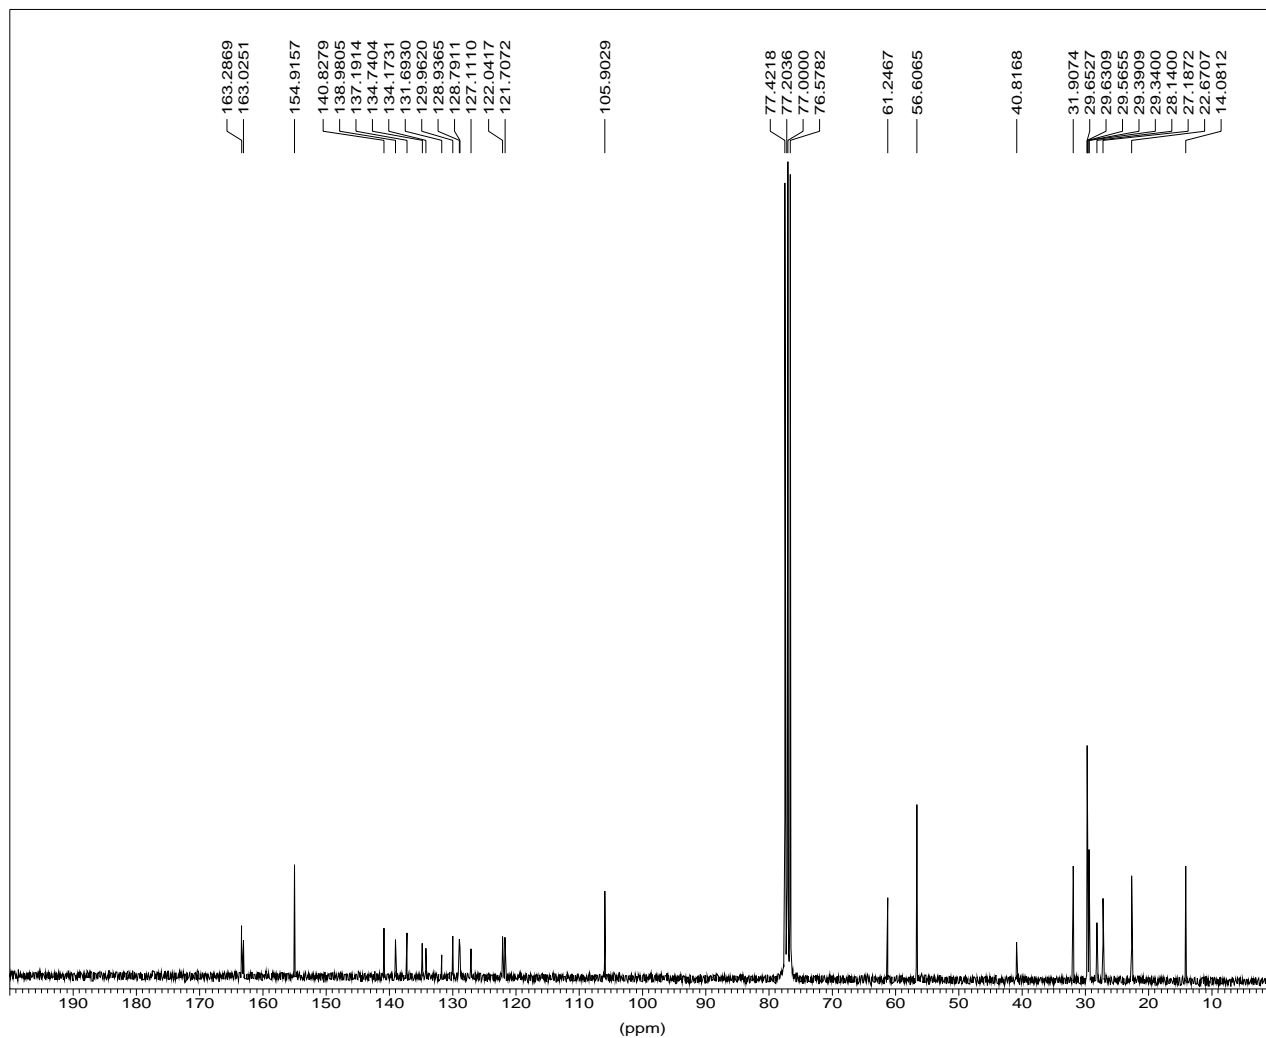

\*\*\* Current Data Parameters \*\*\*

NAME : nv20siva  
EXPNO : 2  
PROCNO : 1  
\*\*\* Acquisition Parameters \*\*\*  
DATE\_t : 05:14:26  
DATE\_d : Nov 20 2007  
DS : 2  
NS : 21016  
O1 : 7924.11 Hz  
O2 : 1200.52 Hz  
O3 : 7546.30 Hz  
SFO1 : 75.4756731 MHz  
SFO2 : 300.1312005 MHz  
SFO3 : 75.4752953 MHz  
SOLVENT : CDCl3  
\*\*\* Processing Parameters \*\*\*  
AZFW : 0.500 ppm  
\*\*\* 1D NMR Plot Parameters \*\*\*  
SR : 1.02 Hz

Figure S5.  $^1\text{H}$  and  $^{13}\text{C}$  NMR of PDI2

siva221

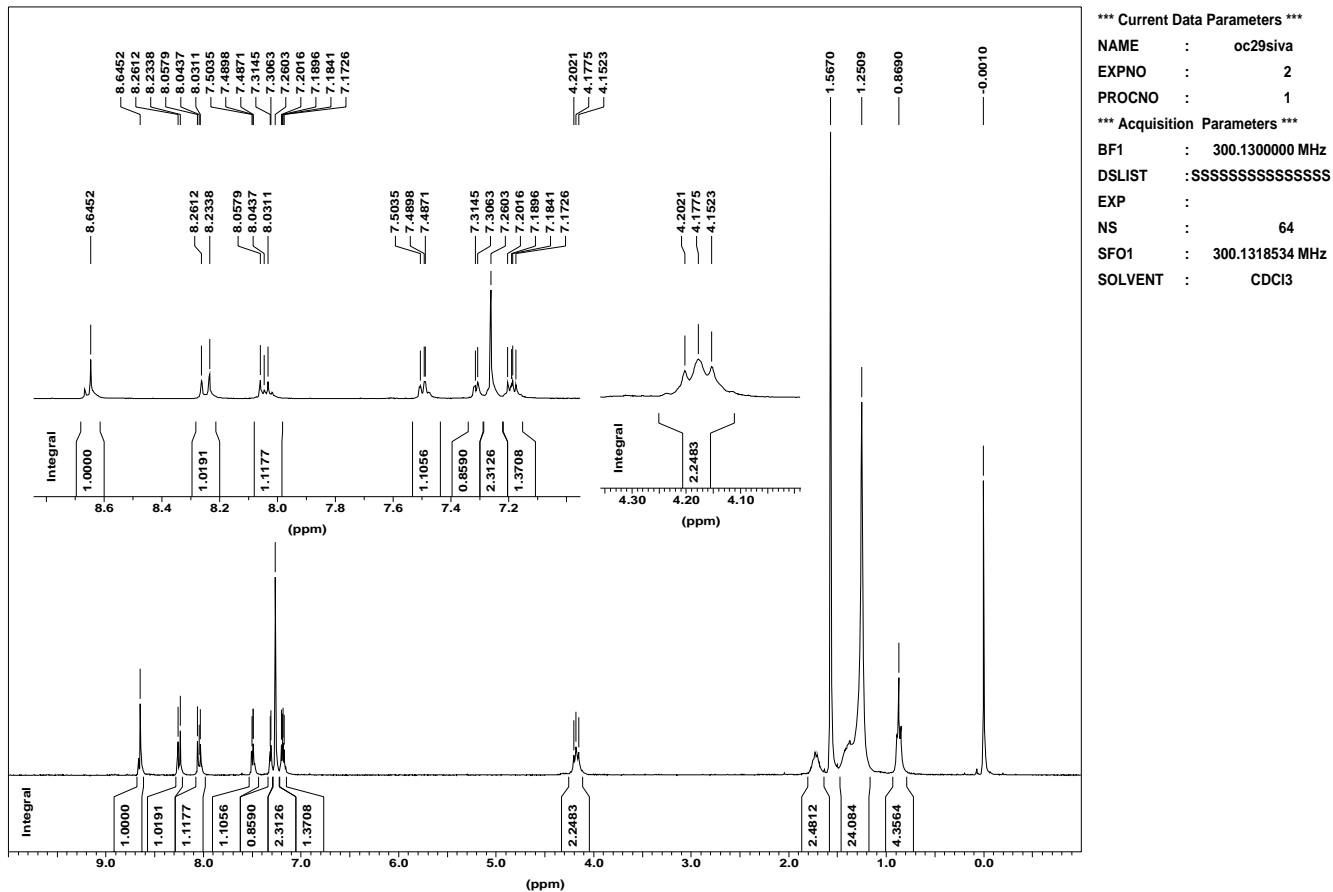

Supplementary Material (ESI) for *Journal of Materials Chemistry*  
This journal is © the Royal Society of Chemistry 2009

<sup>13</sup>C of PDI2

siva221

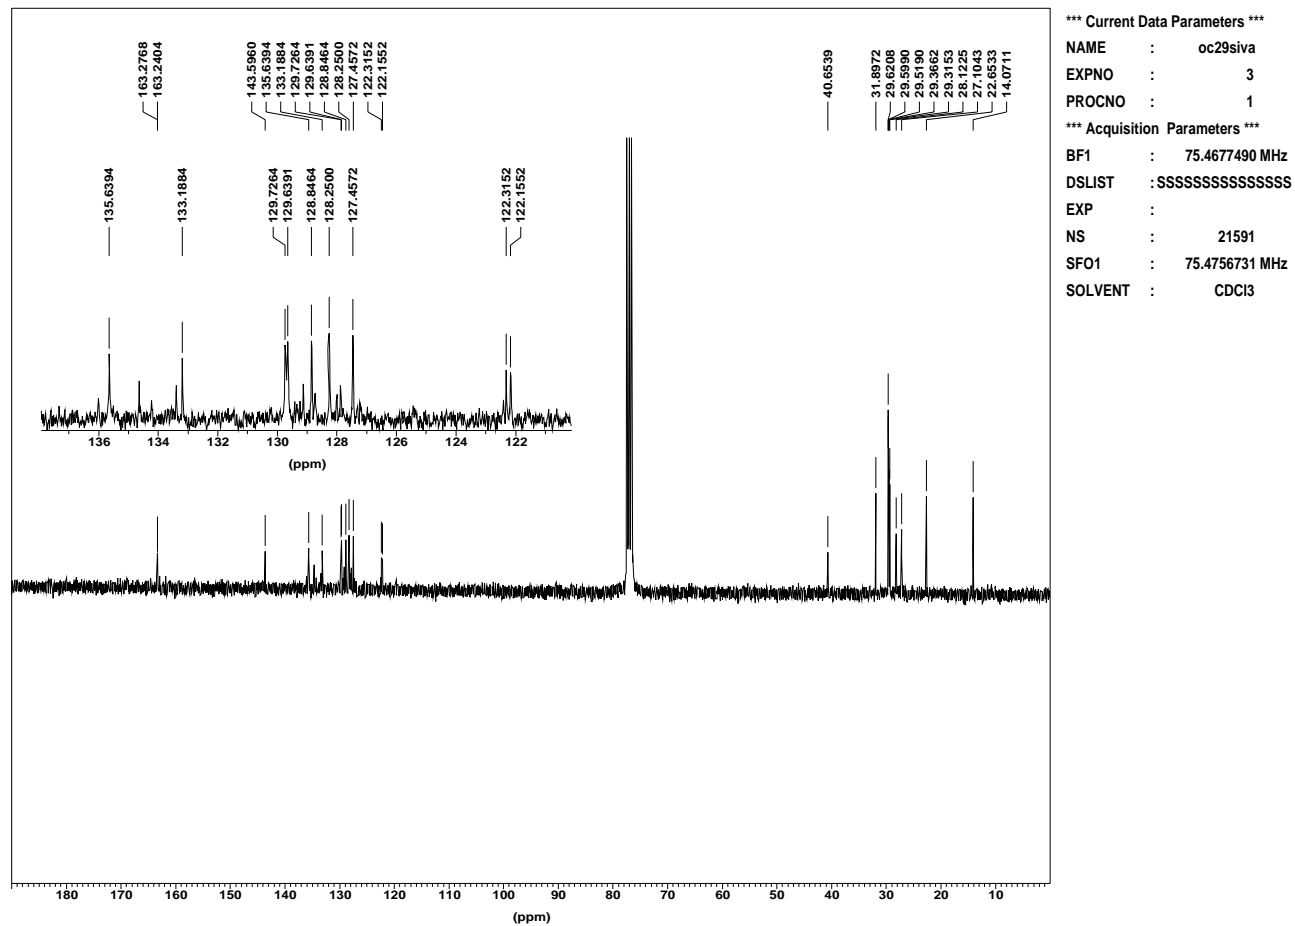



Figure 6S.  $^1\text{H}$  and  $^{13}\text{C}$  NMR of PDI3

siva226

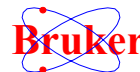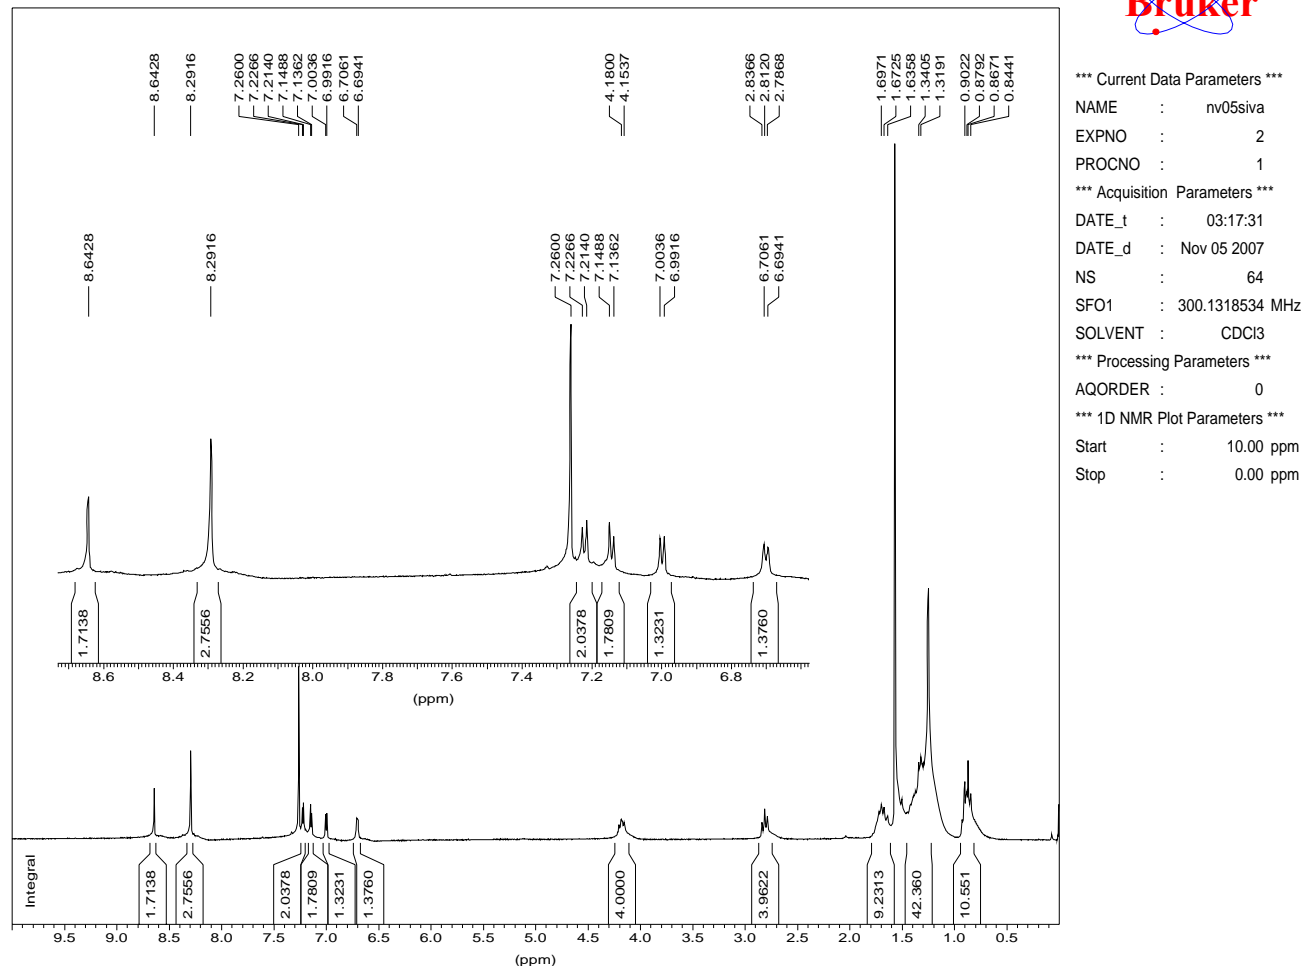

Supplementary Material (ESI) for *Journal of Materials Chemistry*  
This journal is © the Royal Society of Chemistry 2009

$^{13}\text{C}$  of PDI3

siva226

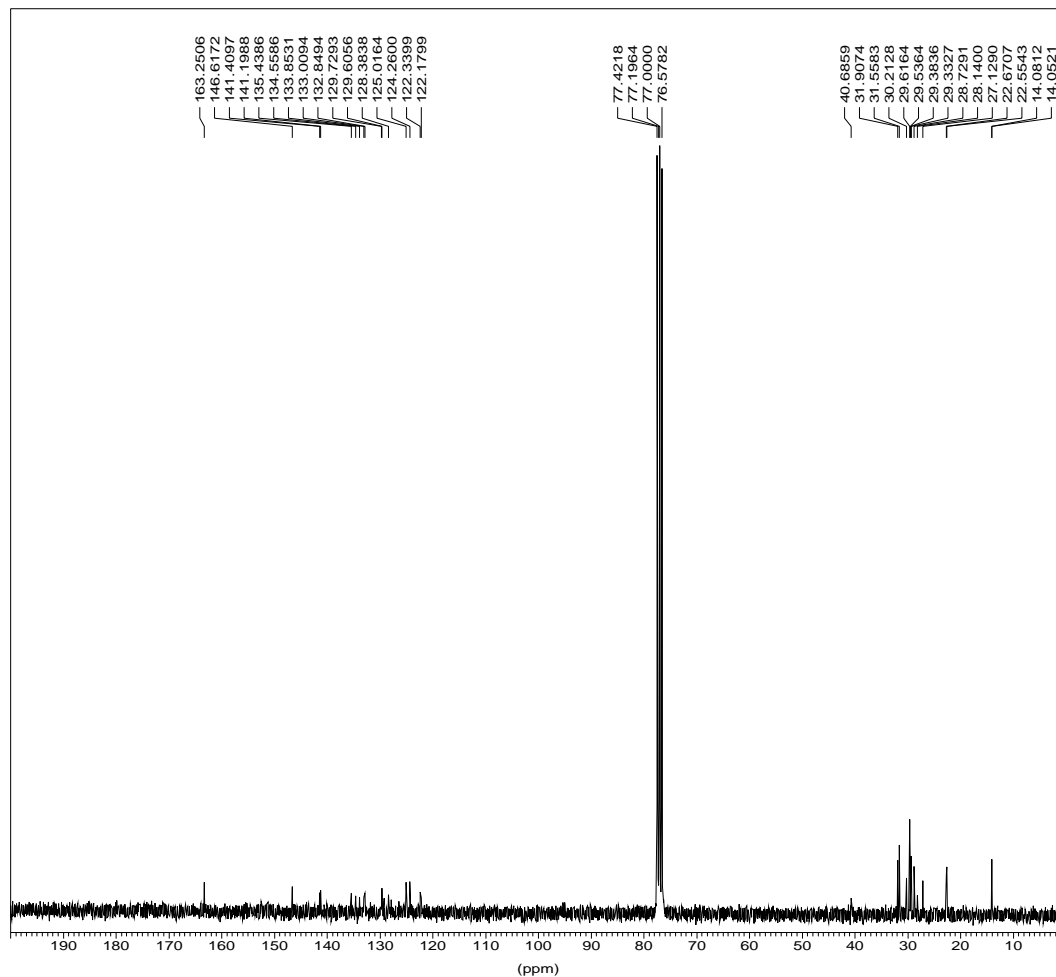

\*\*\* Current Data Parameters \*\*\*

NAME : nv05siva  
EXPNO : 3  
PROCNO : 1

\*\*\* Acquisition Parameters \*\*\*

DATE\_t : 03:20:26  
DATE\_d : Nov 05 2007  
NS : 5244  
SFO1 : 75.4756731 MHz  
SOLVENT : CDCl3

\*\*\* Processing Parameters \*\*\*

AQORDER : 0

\*\*\* 1D NMR Plot Parameters \*\*\*

Start : 200.00 ppm  
Stop : 0.00 ppm

Figure 7S.  $^1\text{H}$  and  $^{13}\text{C}$  NMR of PDI4

siva210

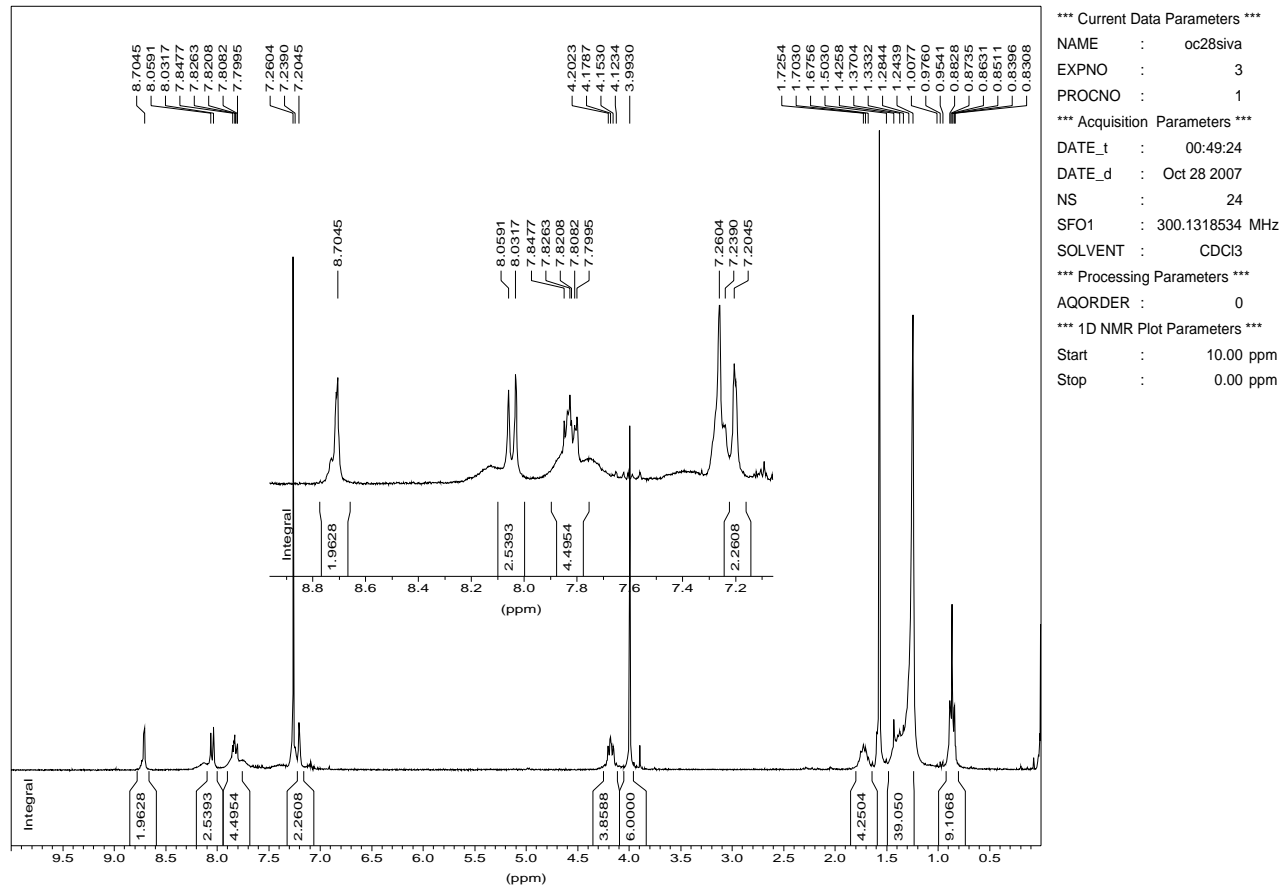

Supplementary Material (ESI) for *Journal of Materials Chemistry*  
This journal is © the Royal Society of Chemistry 2009

$^{13}\text{C}$  of PDI4

siva210

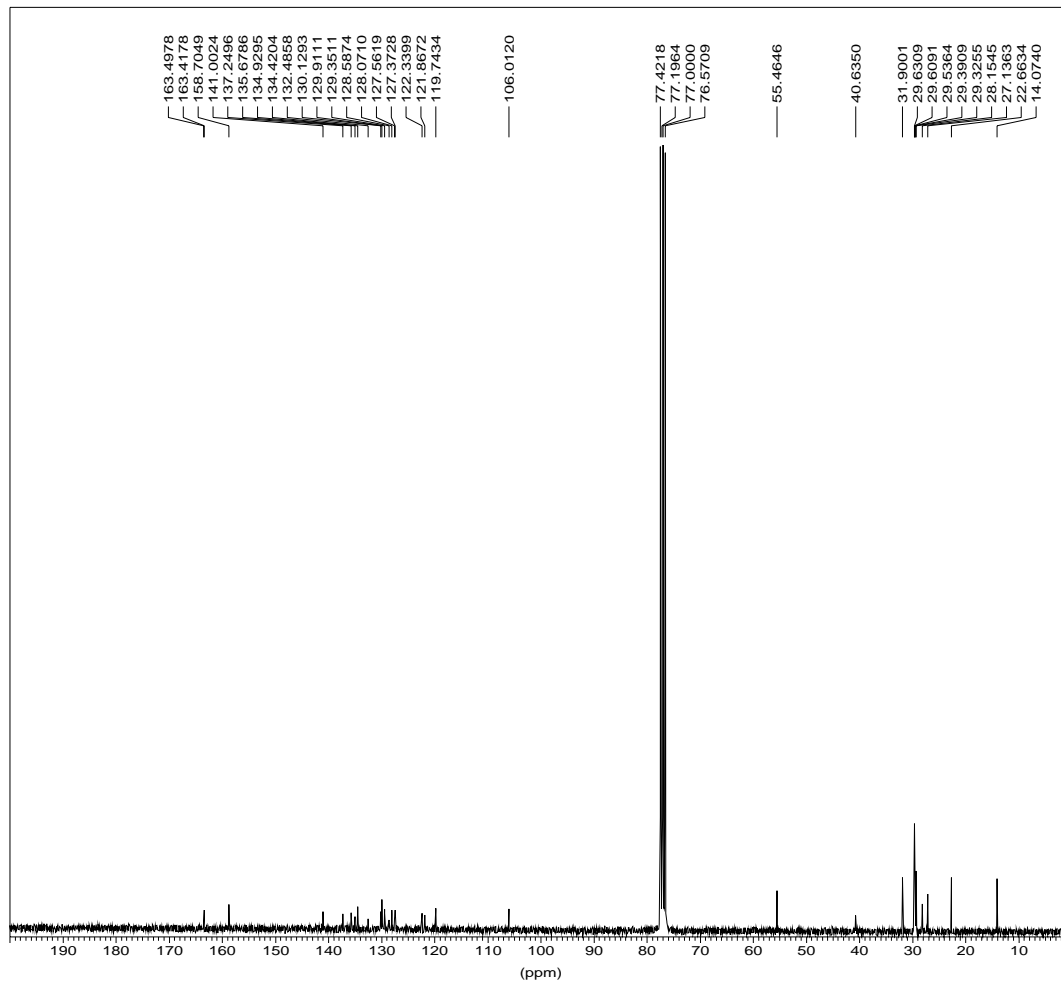

\*\*\* Current Data Parameters \*\*\*

NAME : oc28siva  
EXPNO : 6  
PROCNO : 1

\*\*\* Acquisition Parameters \*\*\*

DATE\_t : 03:41:49  
DATE\_d : Oct 28 2007  
NS : 26014  
SFO1 : 75.4756731 MHz  
SOLVENT : CDCl3

\*\*\* Processing Parameters \*\*\*

AQORDER : 0

\*\*\* 1D NMR Plot Parameters \*\*\*

Start : 200.00 ppm  
Stop : 0.00 ppm

Figure 8S. <sup>1</sup>H and <sup>13</sup>C NMR of PDI5

siva213

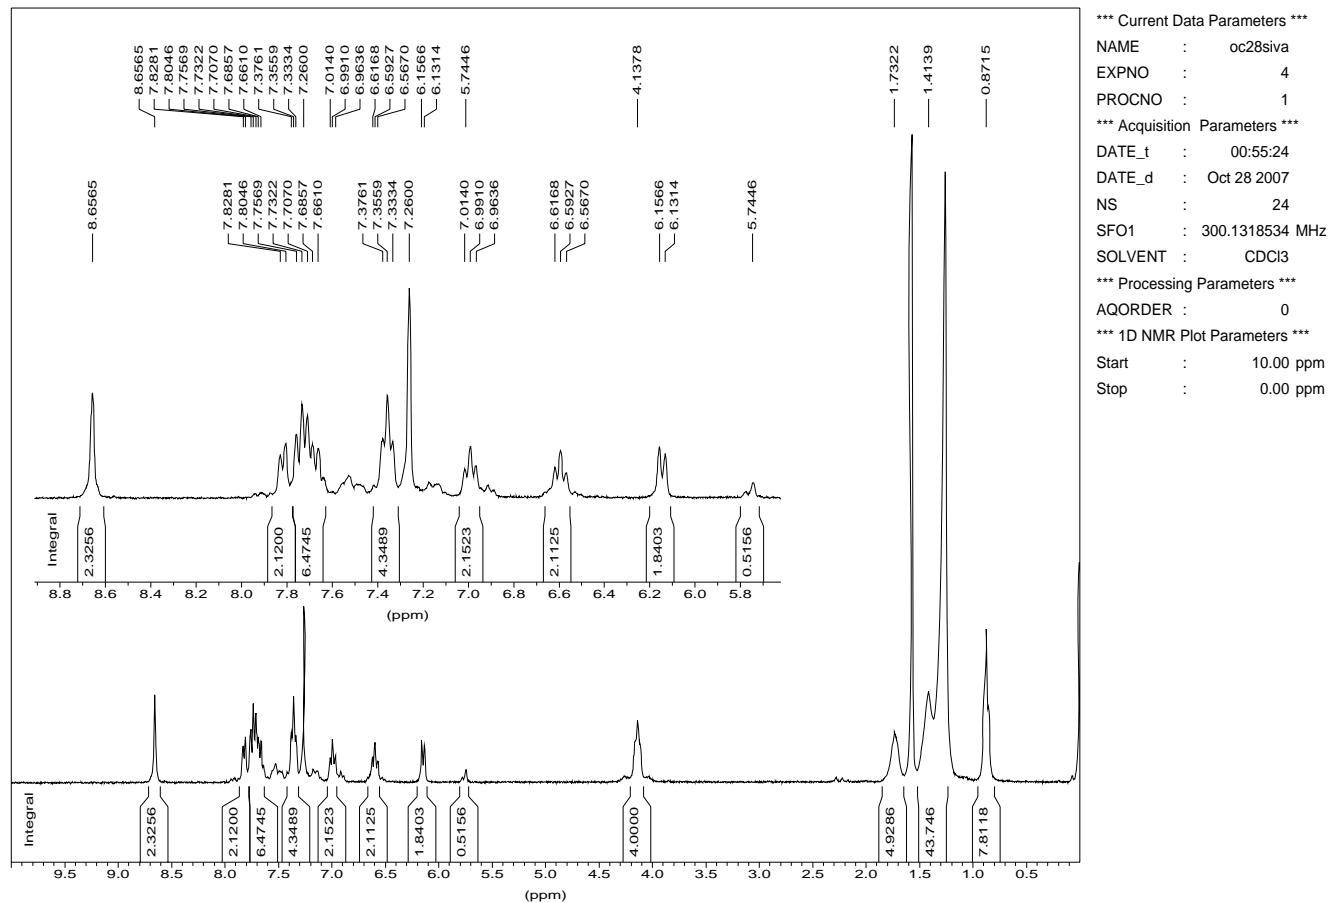

Supplementary Material (ESI) for *Journal of Materials Chemistry*  
This journal is © the Royal Society of Chemistry 2009

$^{13}\text{C}$  of PDI5

siva213

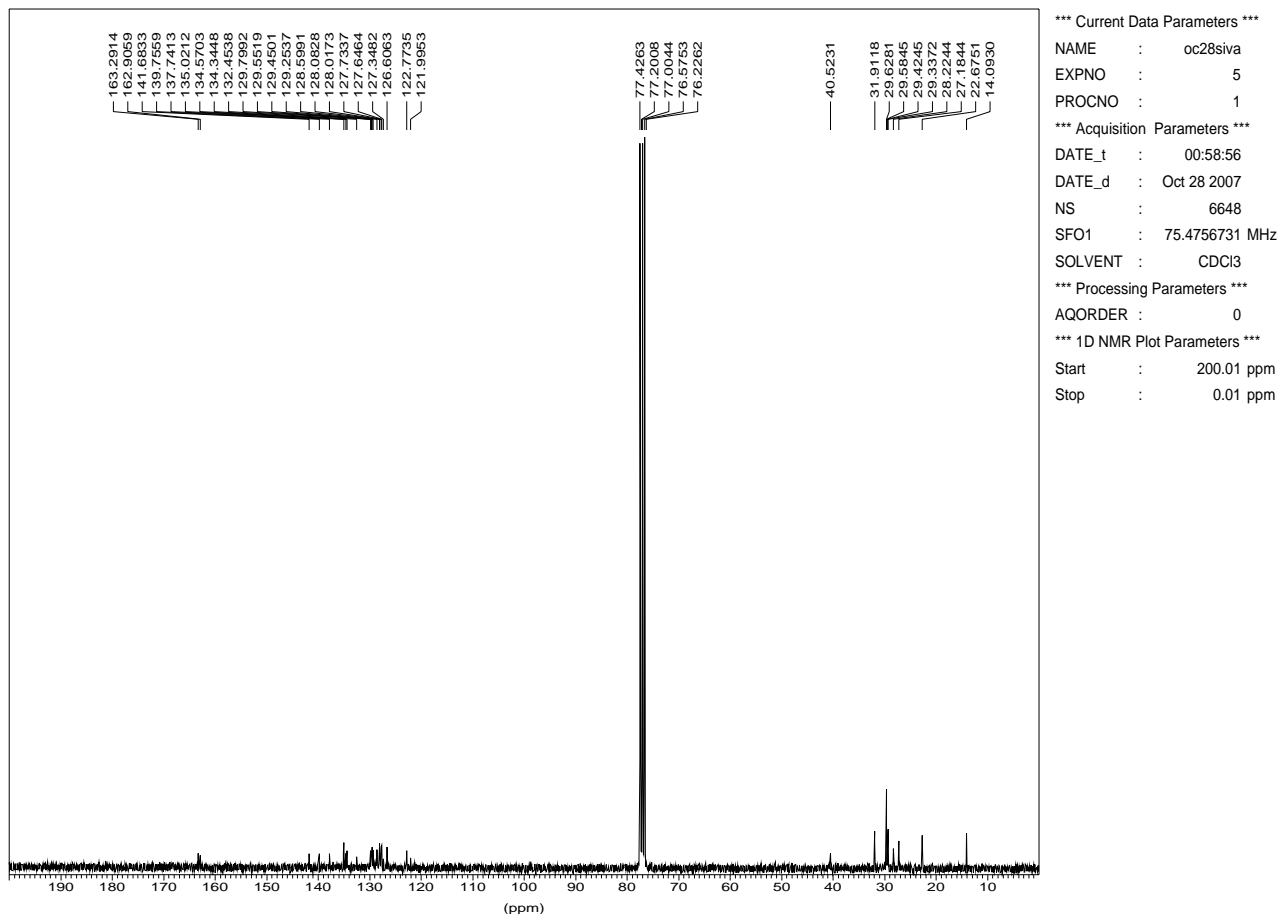

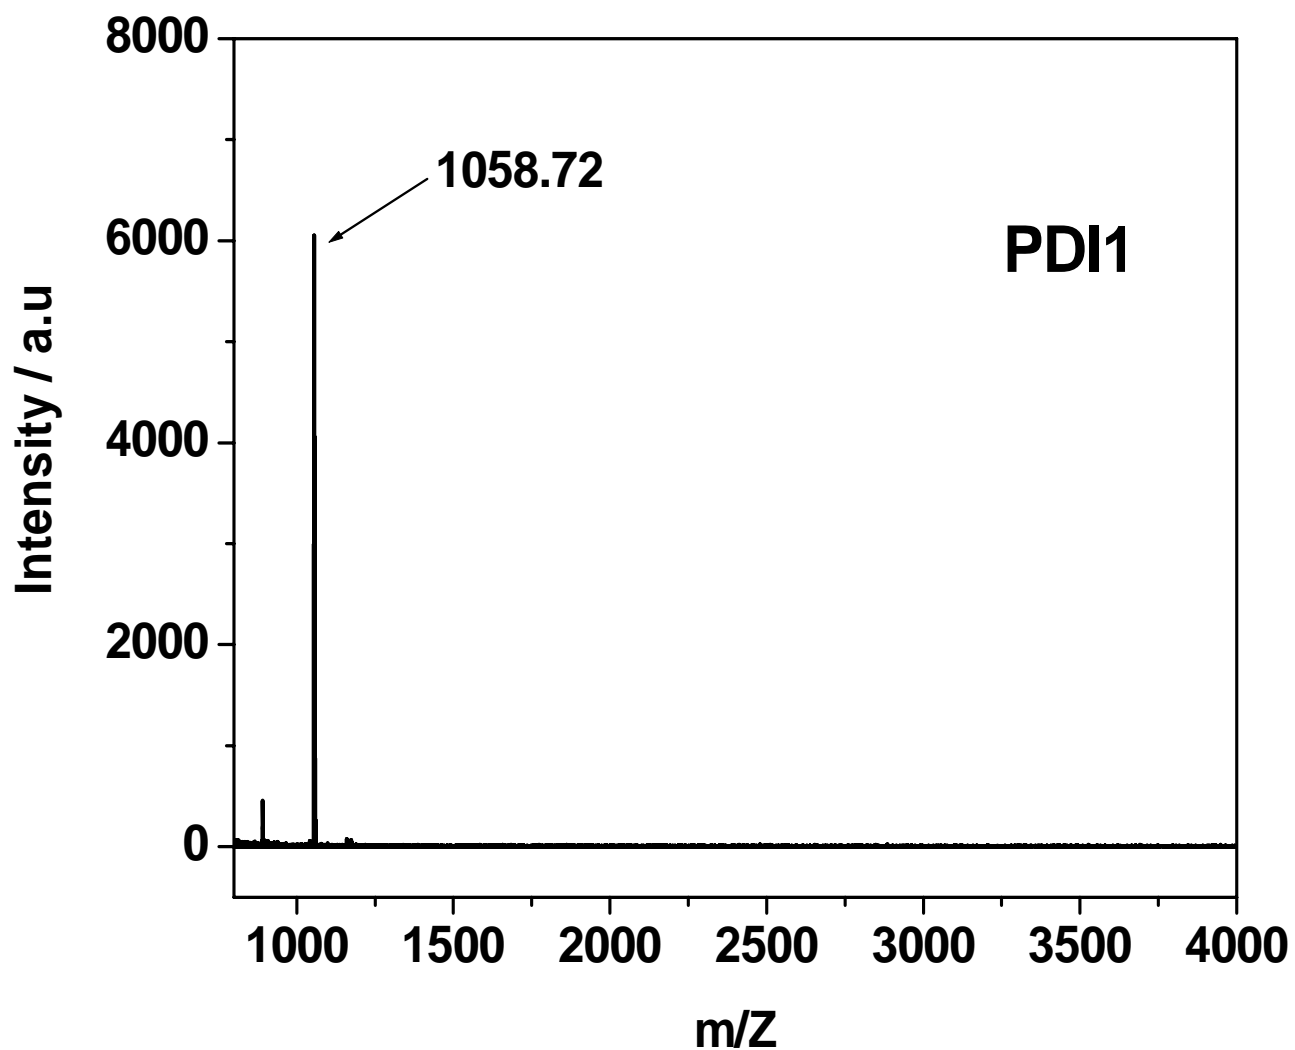

MALDI-TOF of PDI1

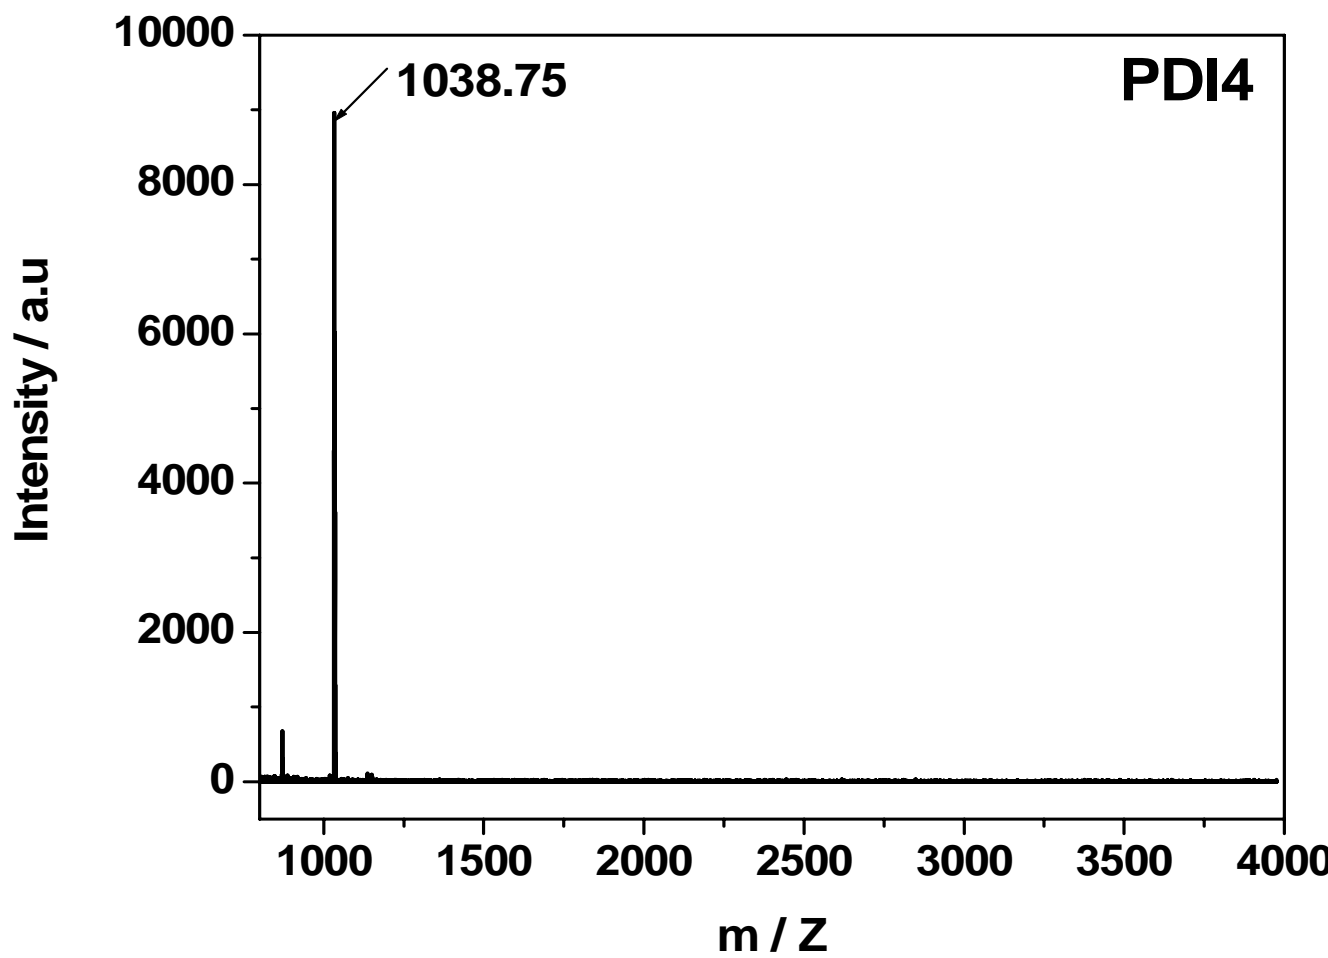

MALDI-TOF of PDI4



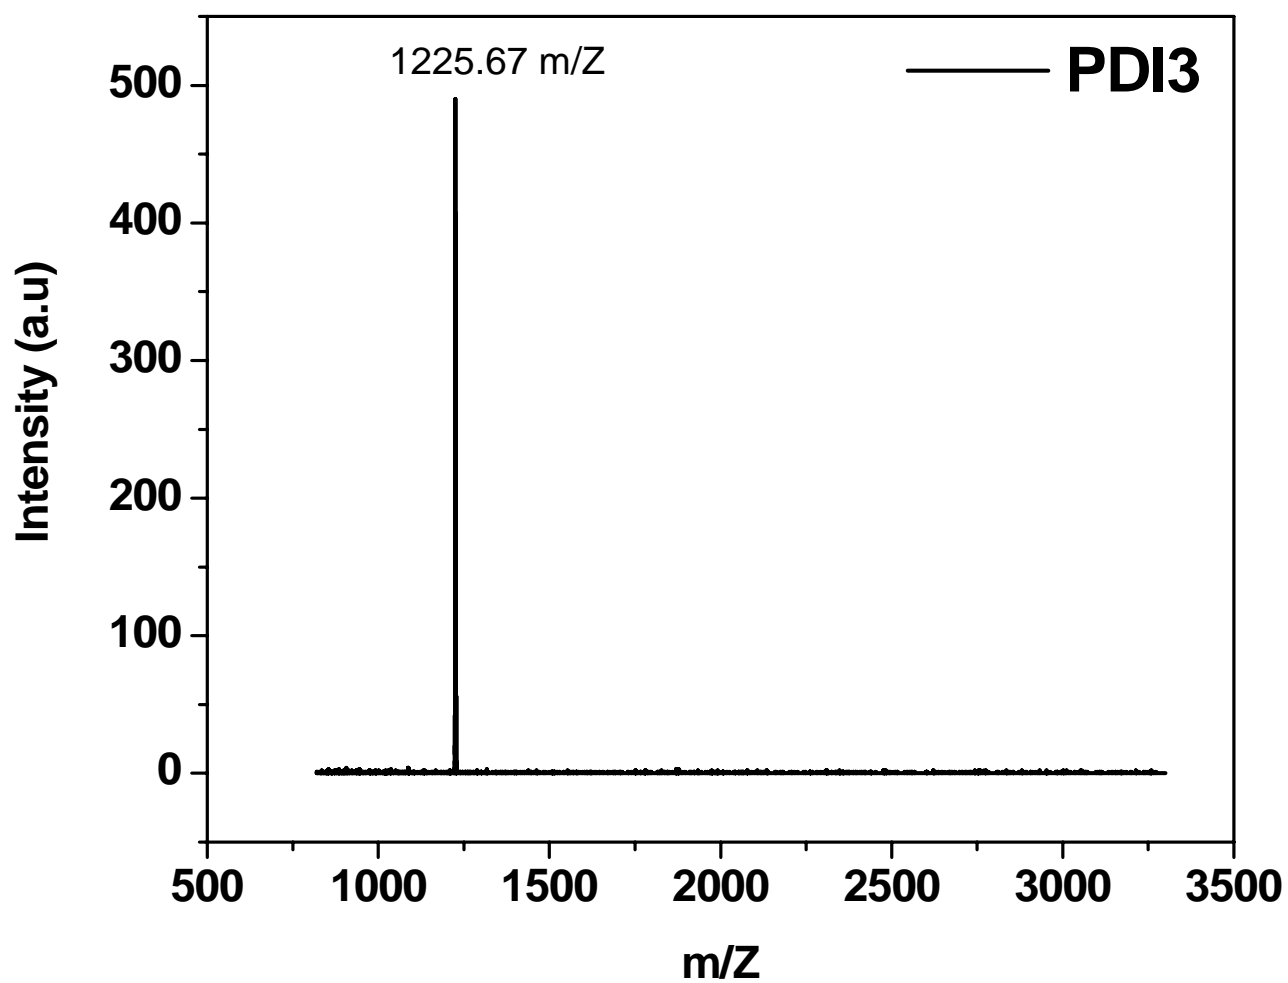

MALDI-TOF of PDI3

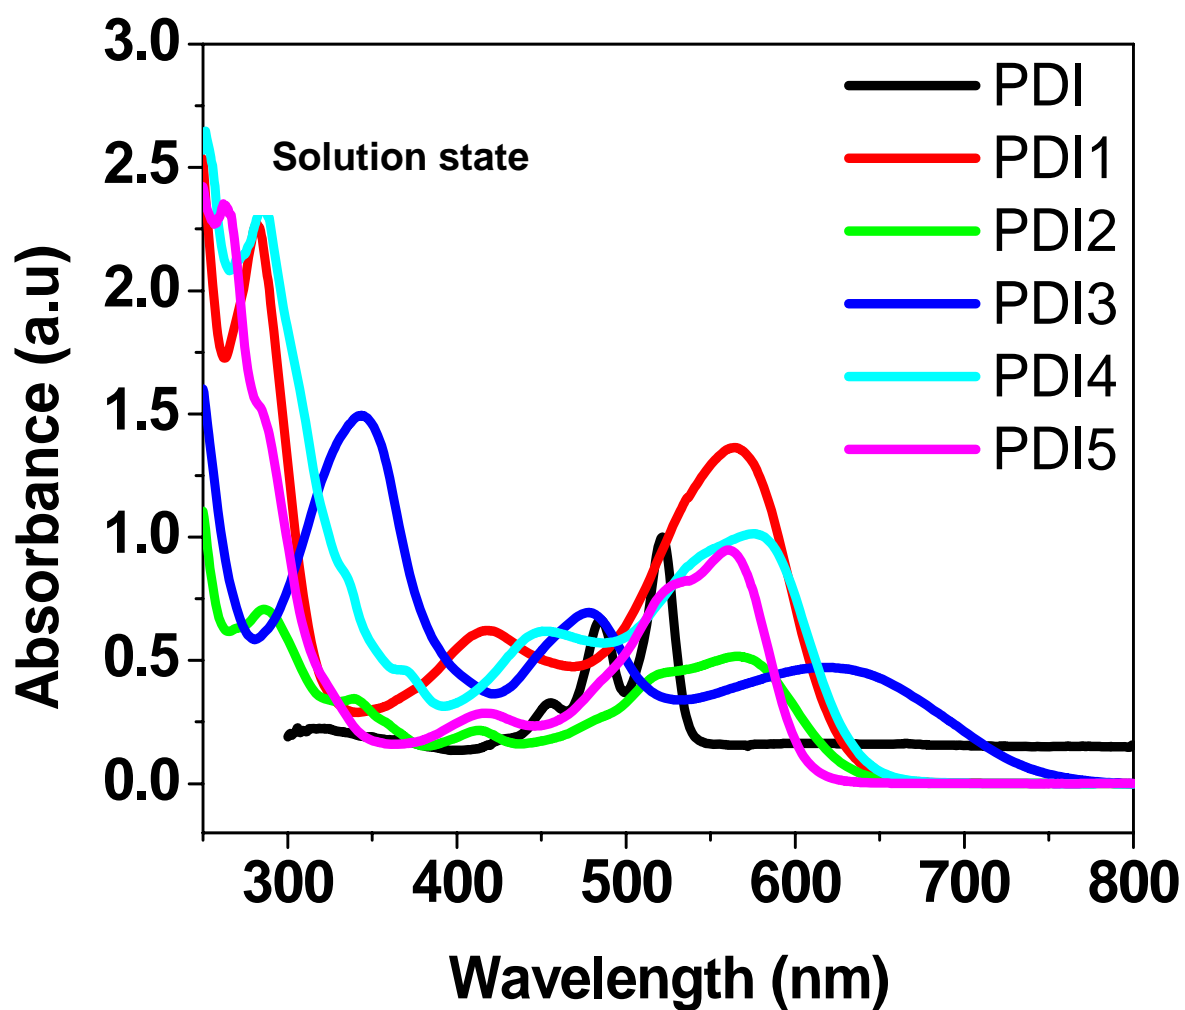

Figure 9S. Absorption spectra in solution

Figure 10S. Absorption spectra of thin films

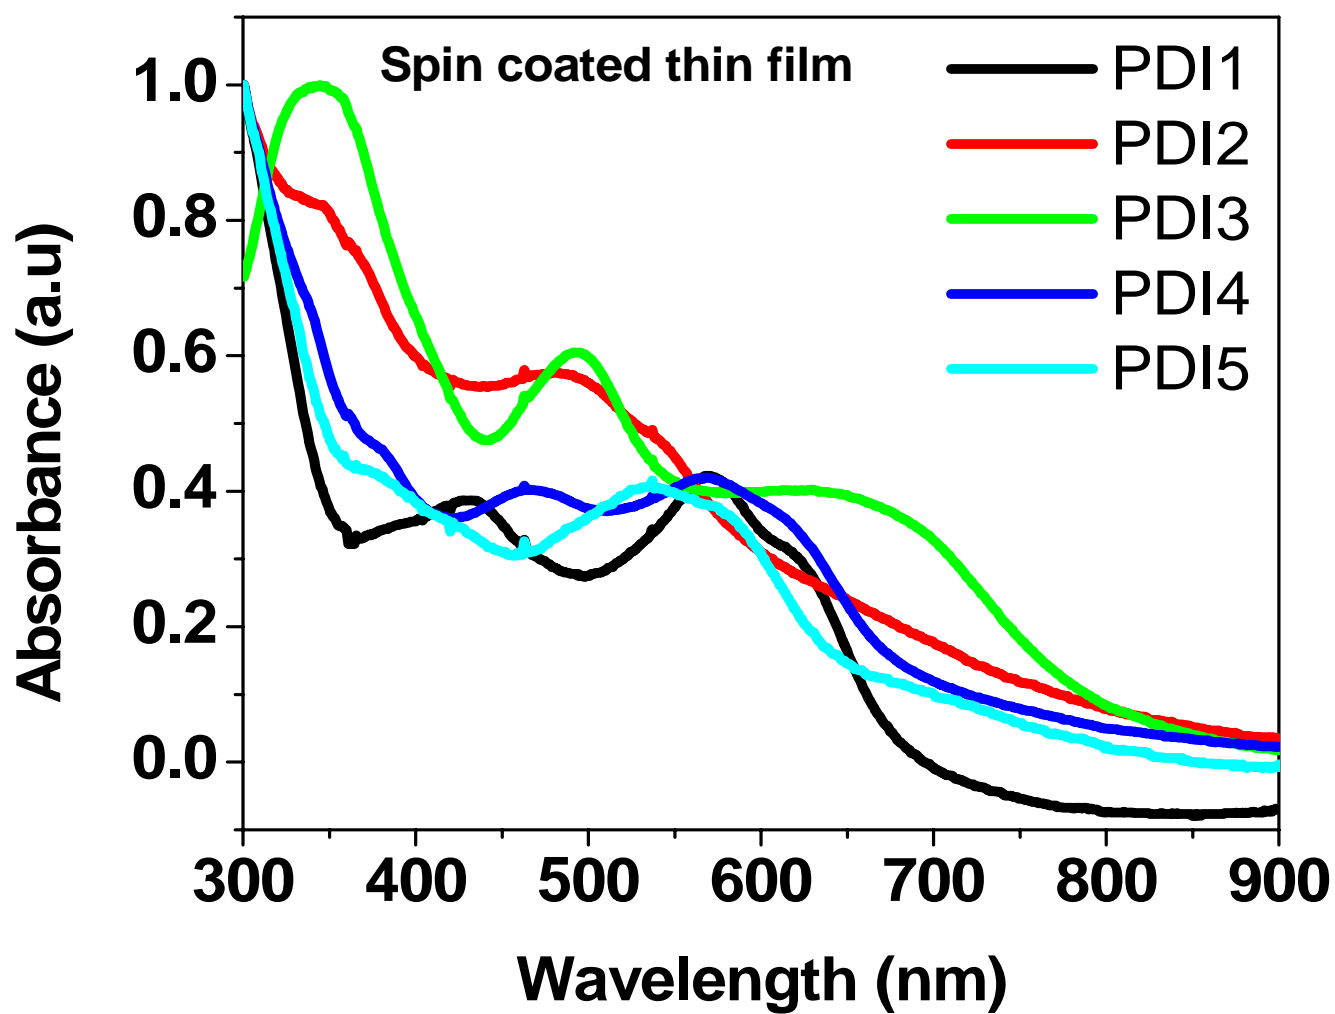

Figure 11S. Emission spectra in solution

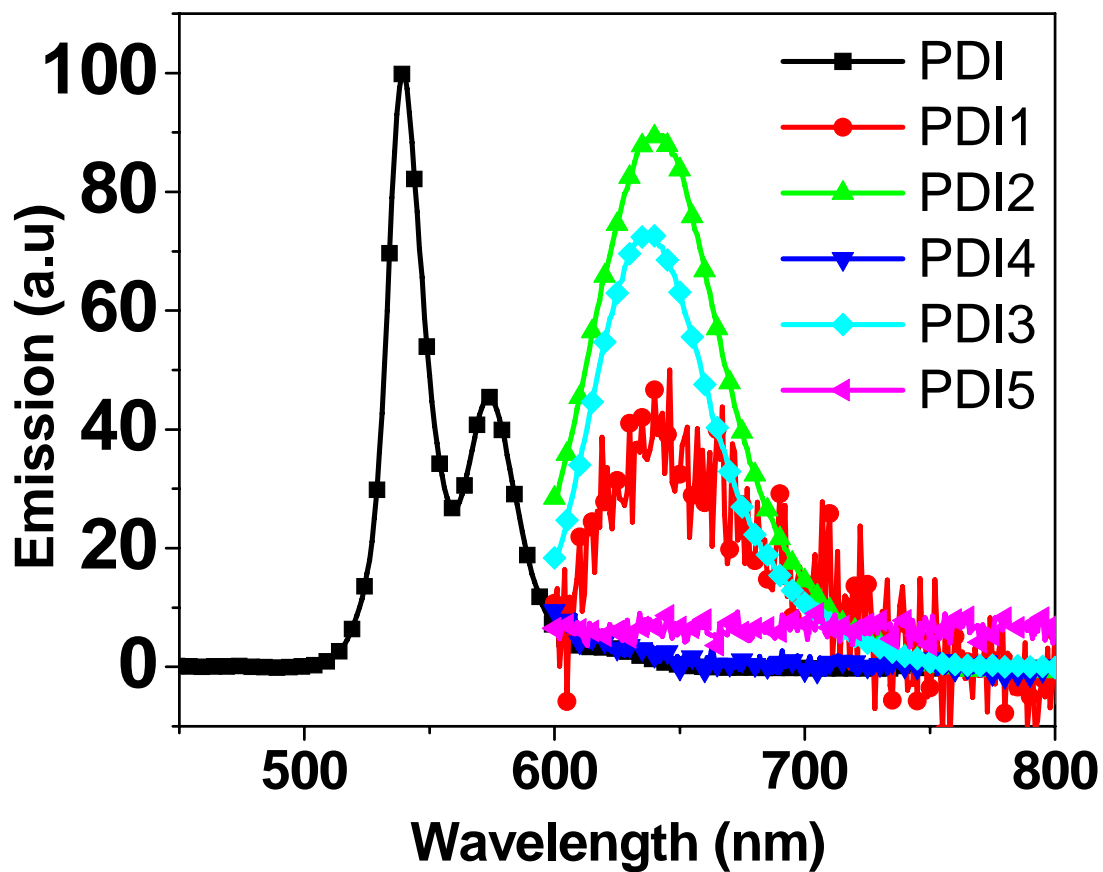

**Figure 12S.** DSC curves of PDI1. Heating-cooling-heating curve. Recorded under nitrogen atmosphere

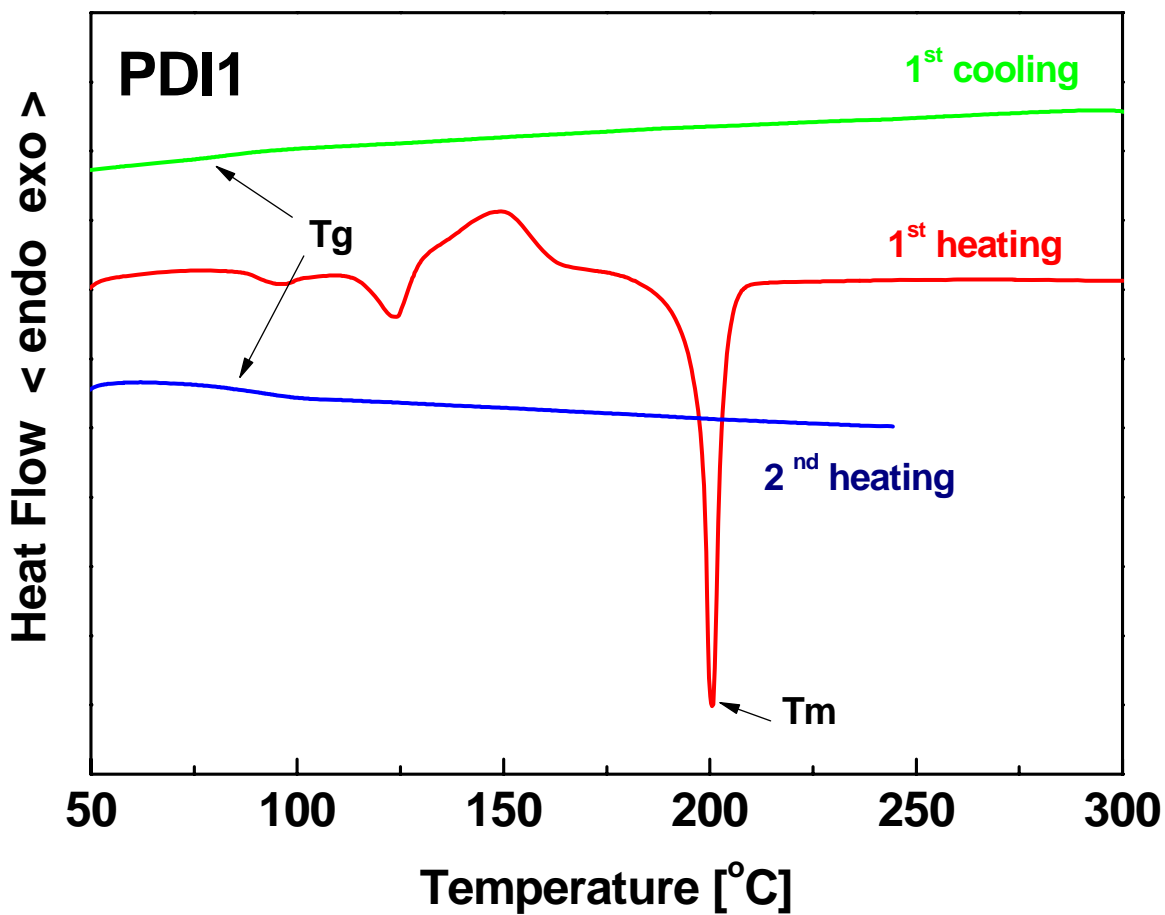

**Figure 13S.** DSC curves of PDI3. Heating-cooling-heating curve. Recorded under nitrogen atmosphere

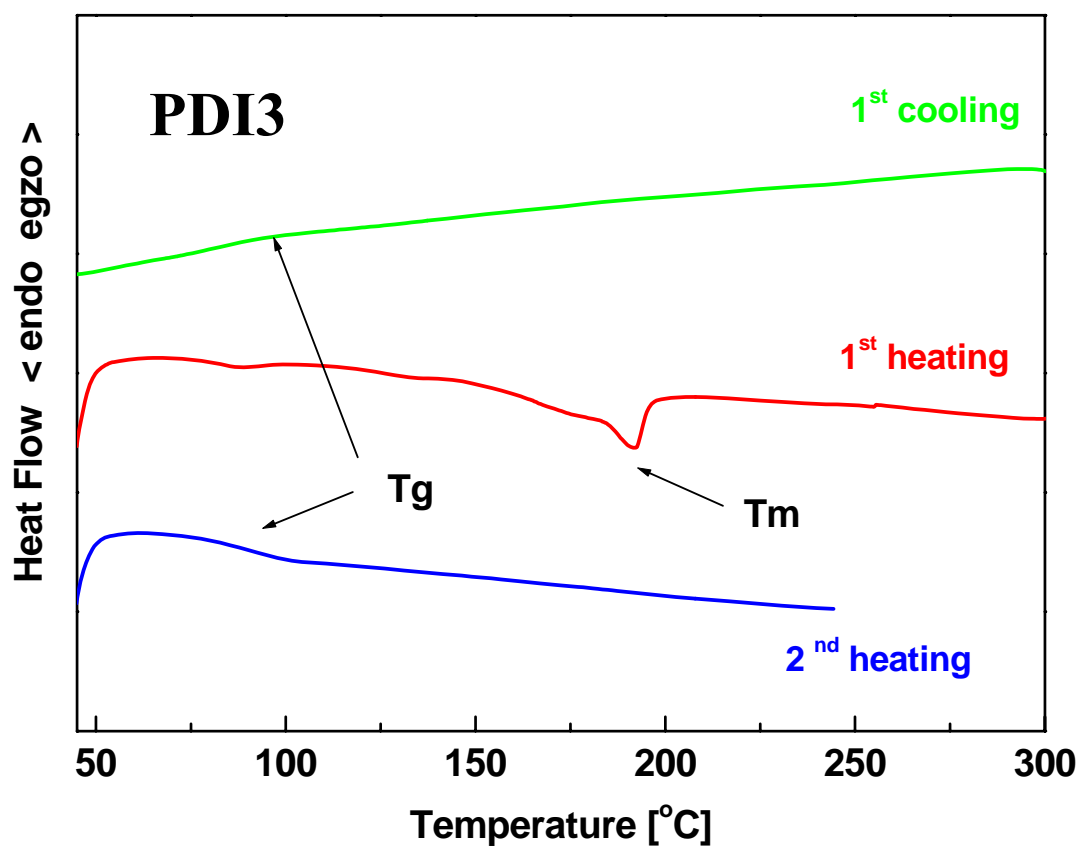

**Figure 14S.** DSC curves of PDI4. Heating-cooling-heating curve. Recorded under nitrogen atmosphere

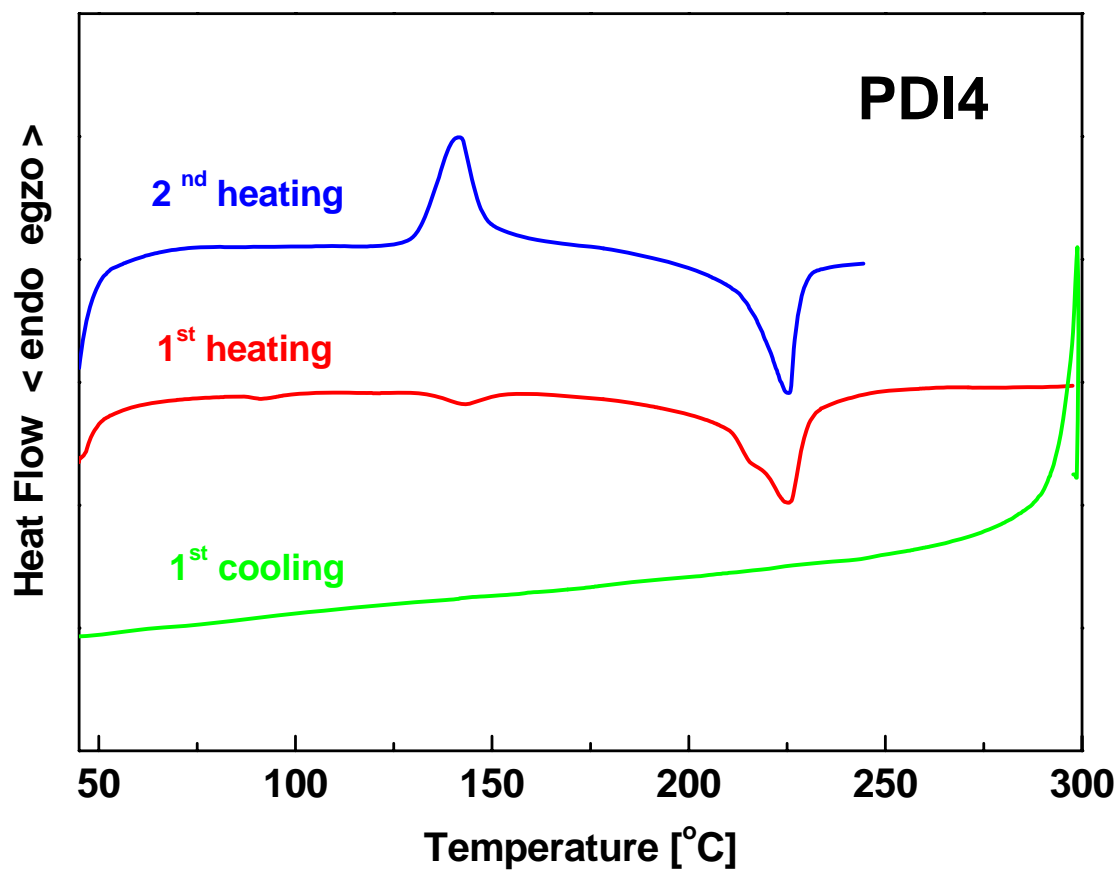

**Figure 15S.** XTOF transients for blend of PDI4 and PC-Z. Arrow marks in insert indicates a transit time of holes

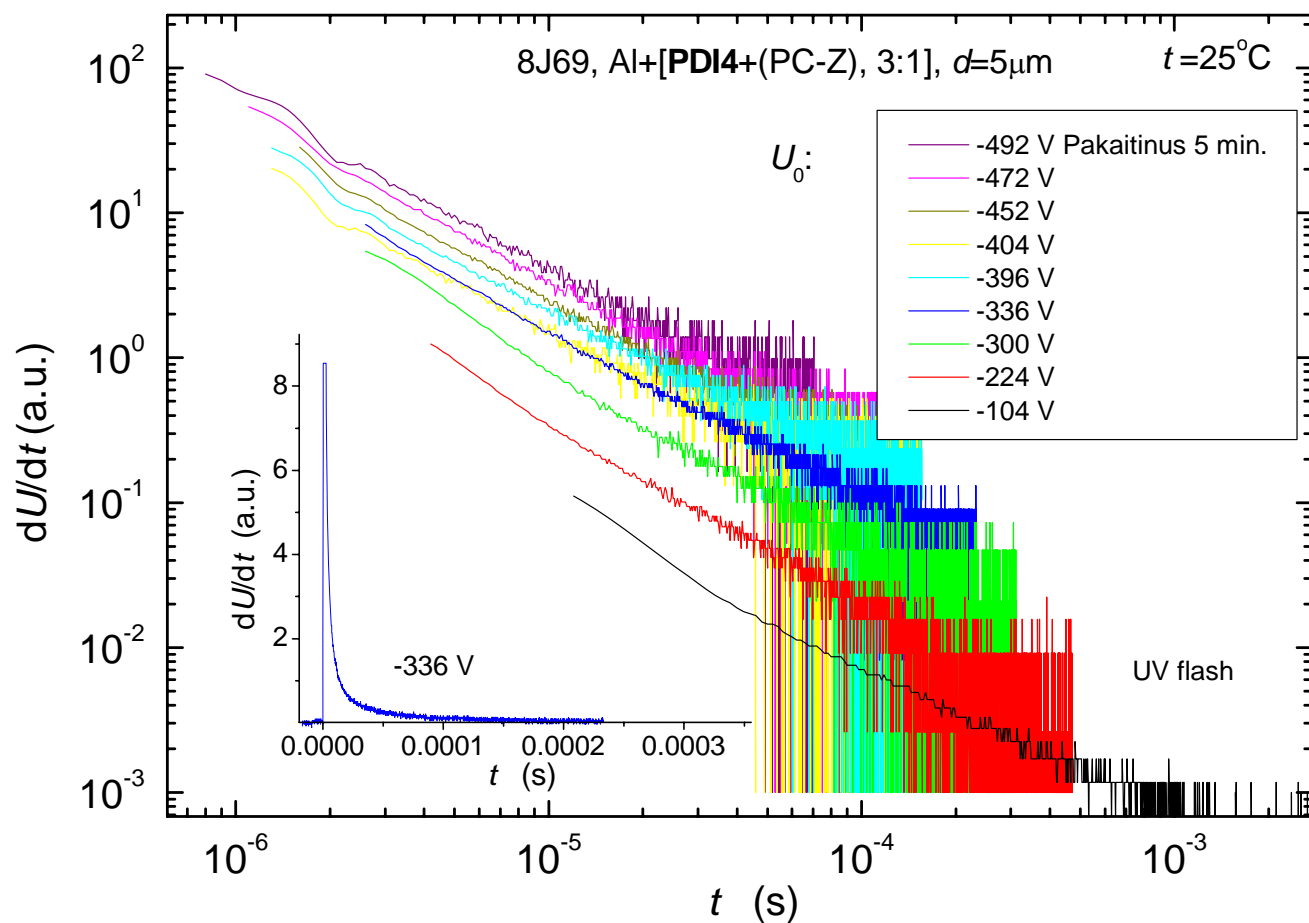



**Figure 16S.** XTOF transients for blend of PDI5 and PC-Z. Arrow marks in insert indicates a transit time of holes

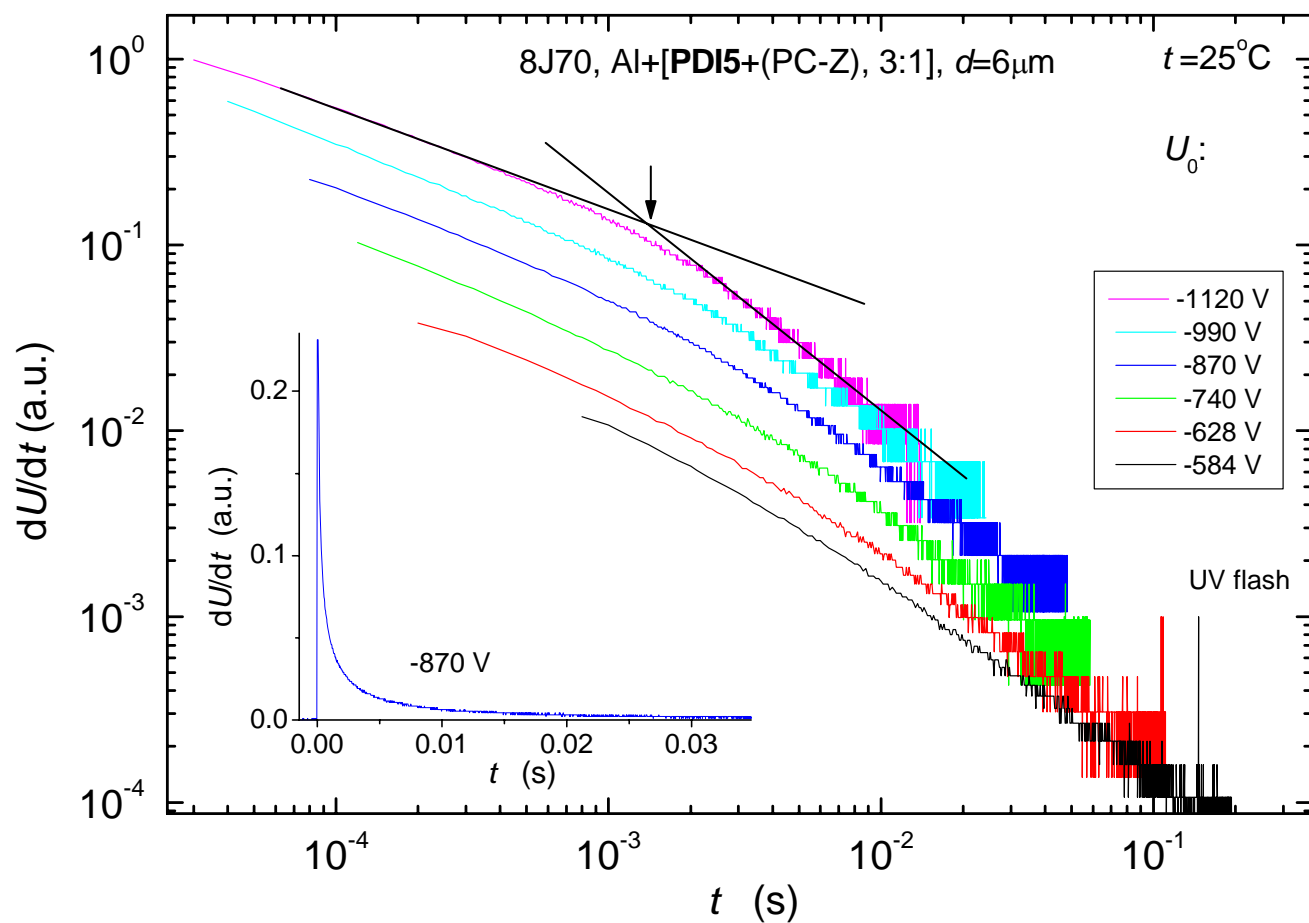

Supplement: b901847f.pdf [file b901847f.pdf]
